# Supplementary figures and images for: Cu-modified InVO4 photocatalysts for enhanced N2 fixation using chemical reagents and electroplating sludge as the Cu source
Source: Royal Society of Chemistry journal article supplement (doi:10.1039/d3cc04737g), 2023-12-27

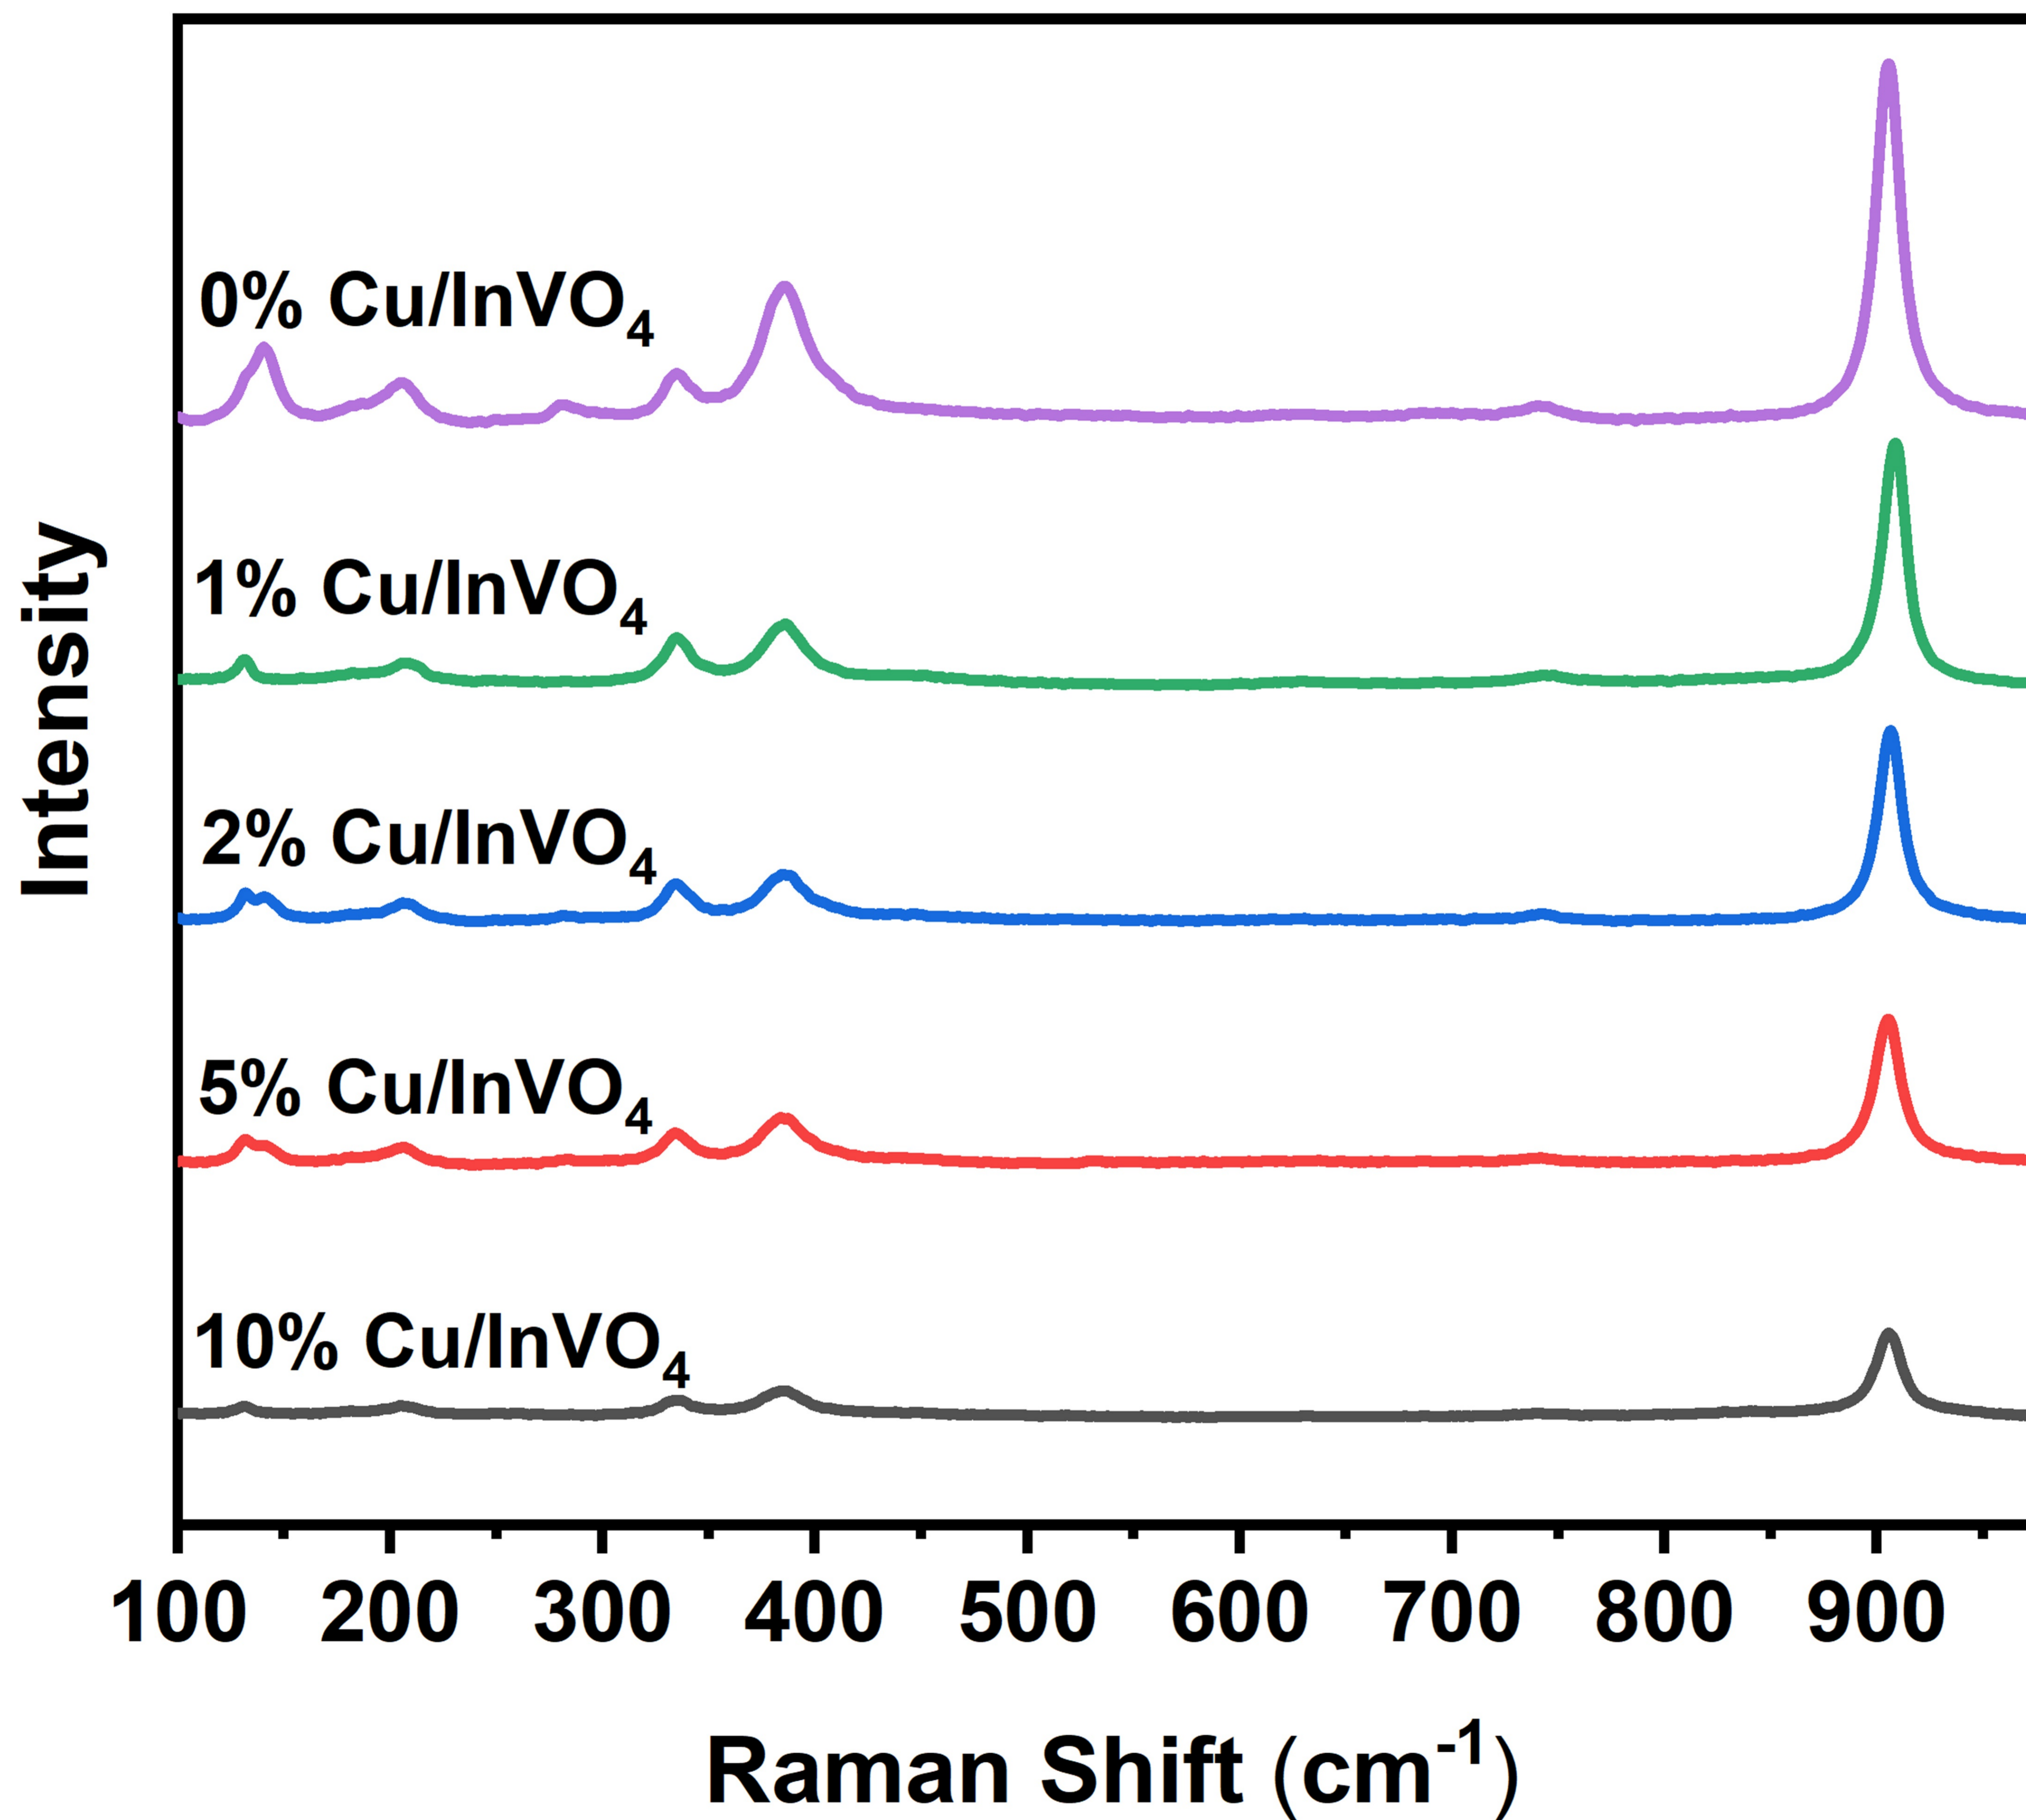

Supplement: d3cc04737g2.pdf [file d3cc04737g2.pdf]

**a**

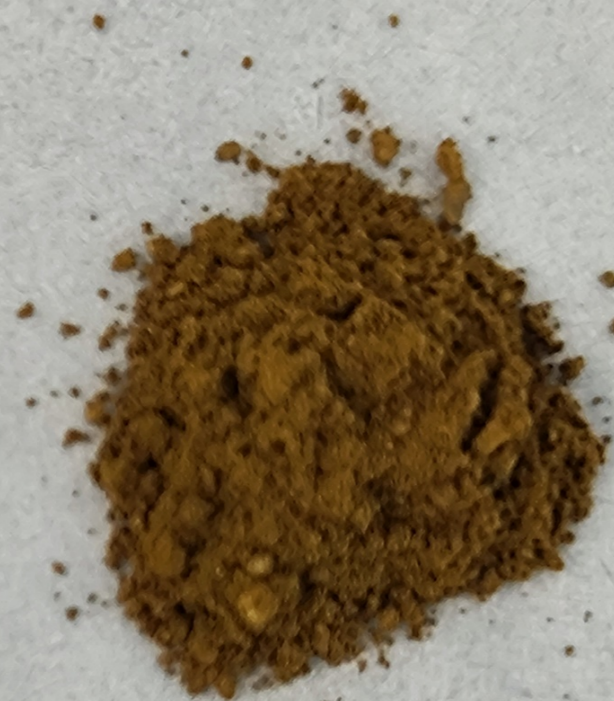

**b**

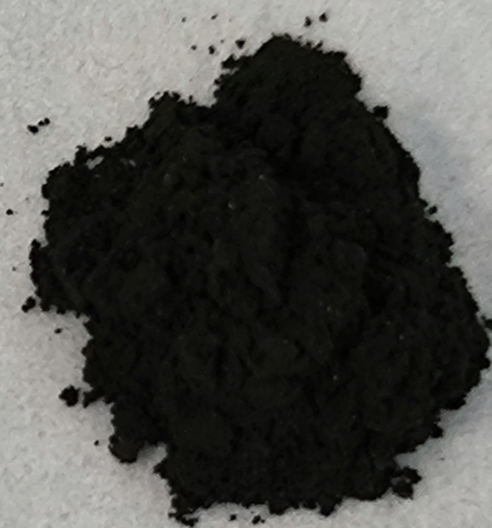

Supplement: d3cc04737g3.pdf [file d3cc04737g3.pdf]

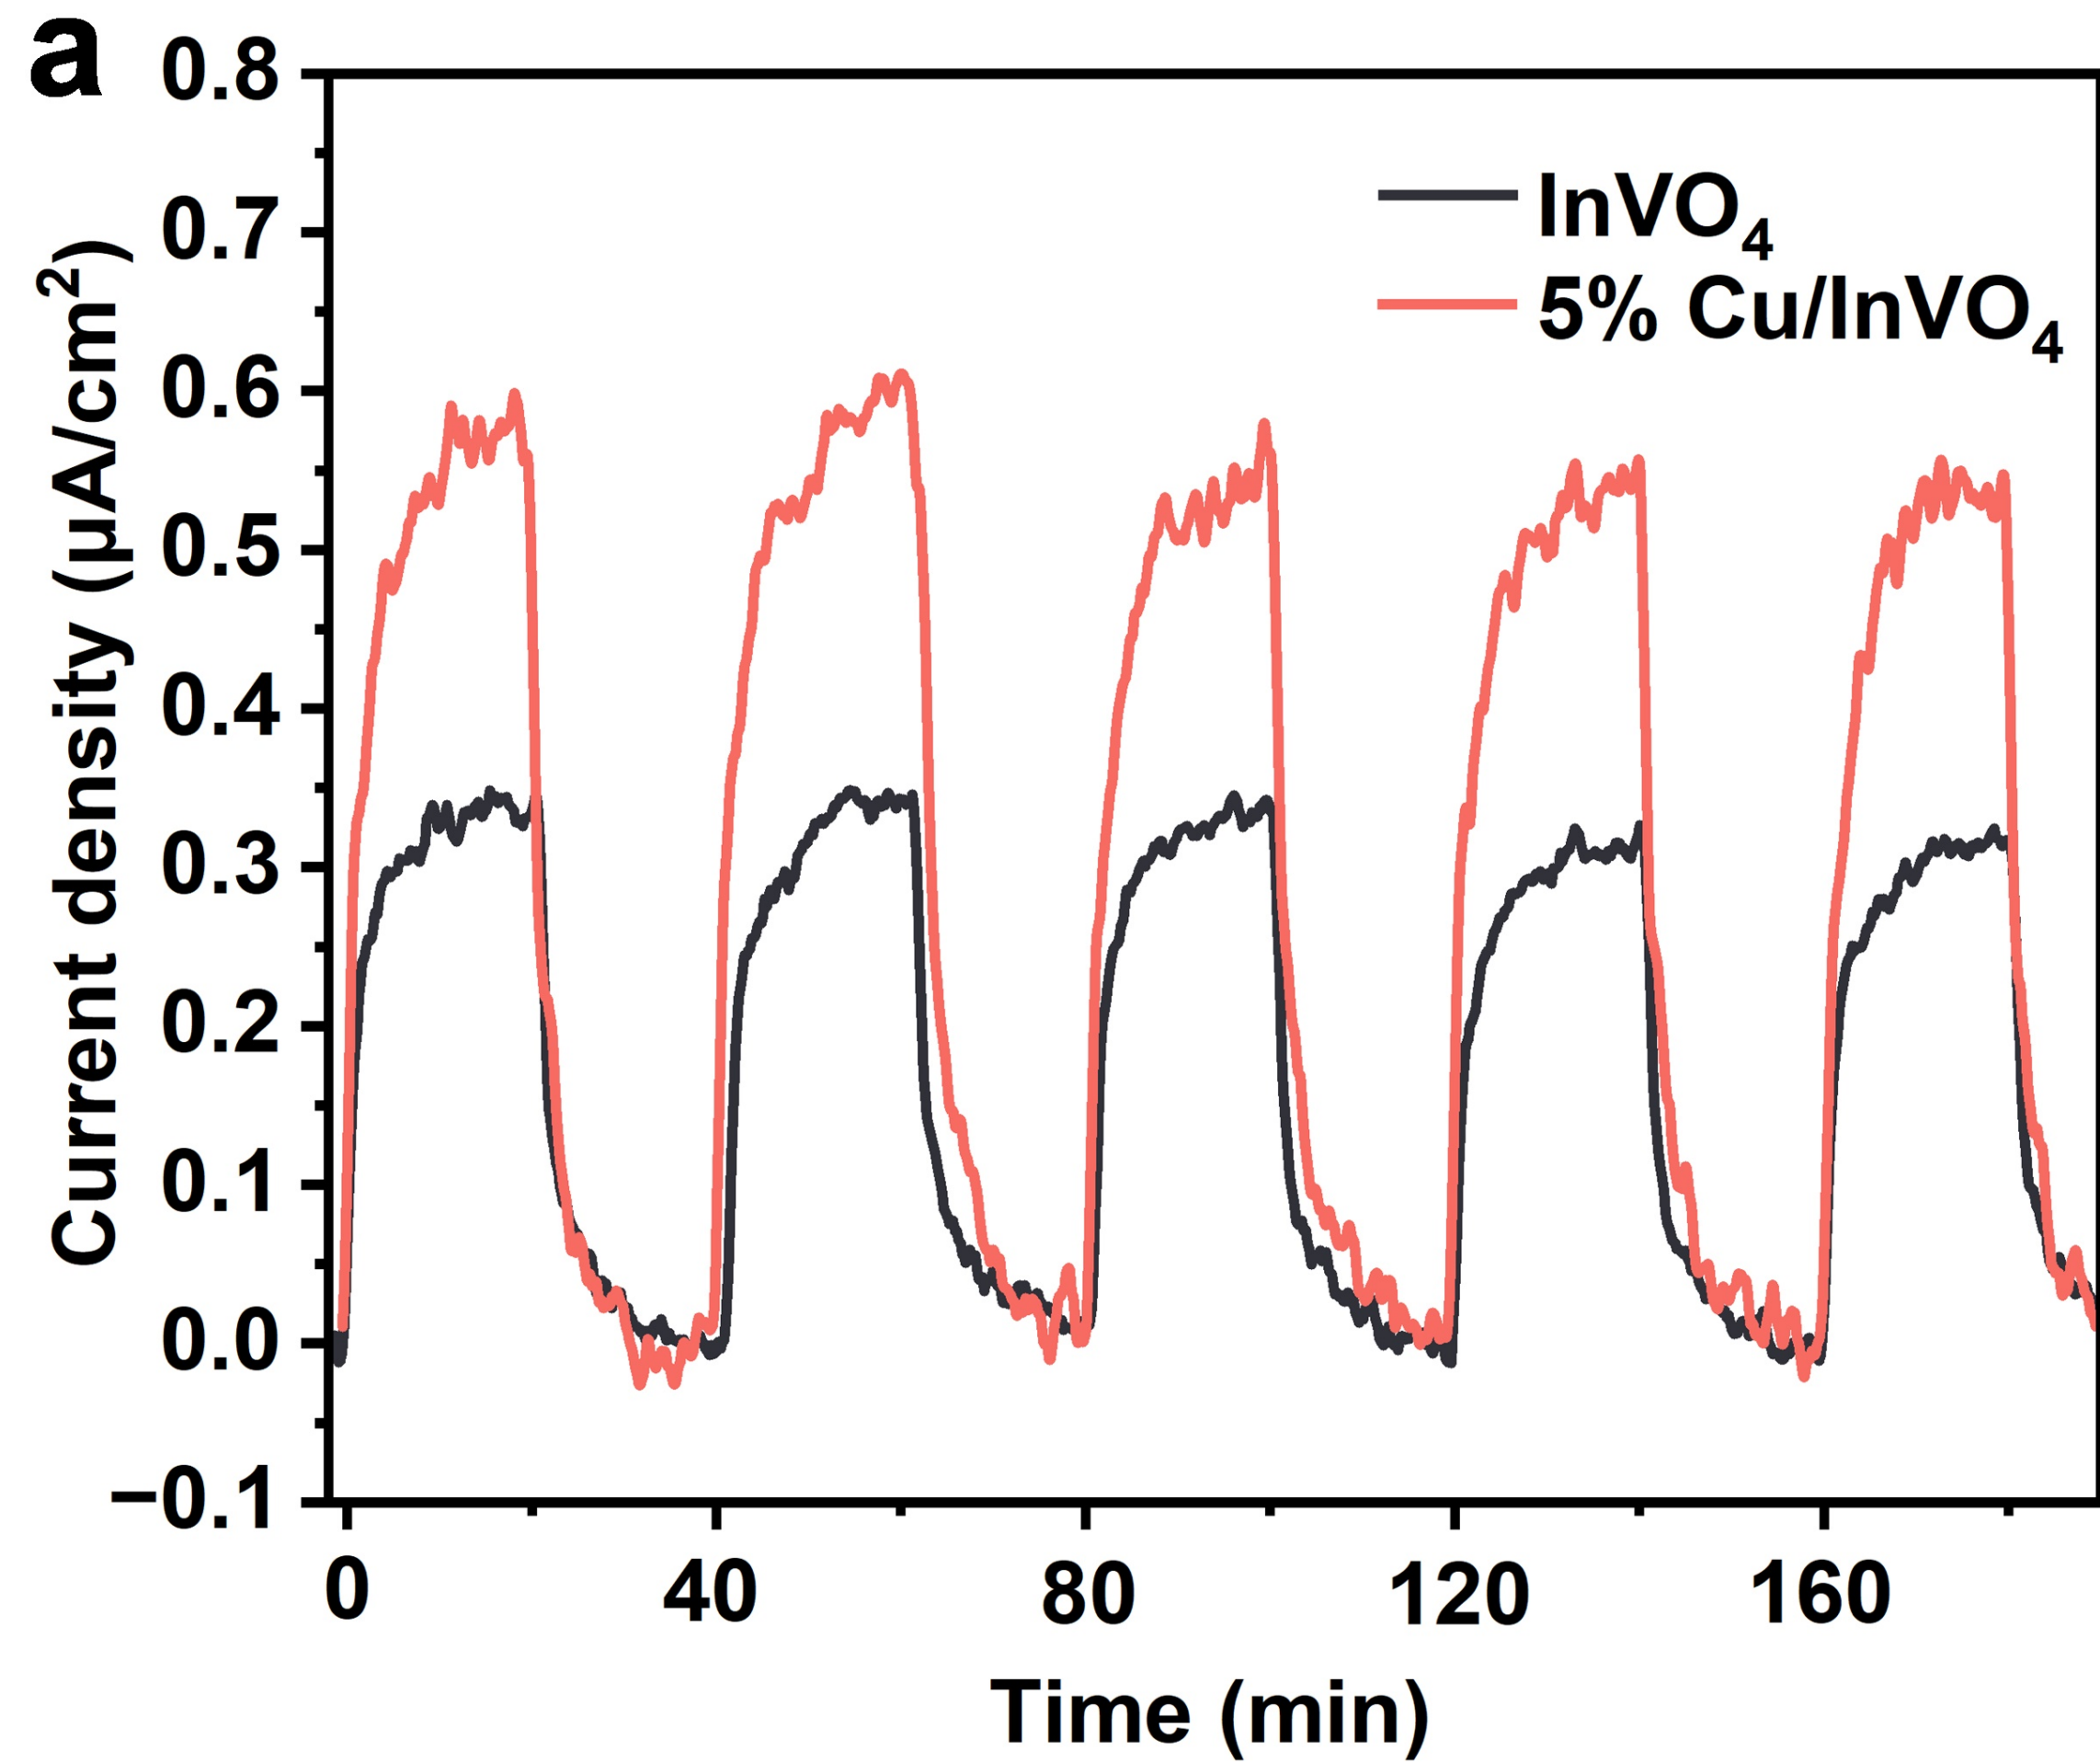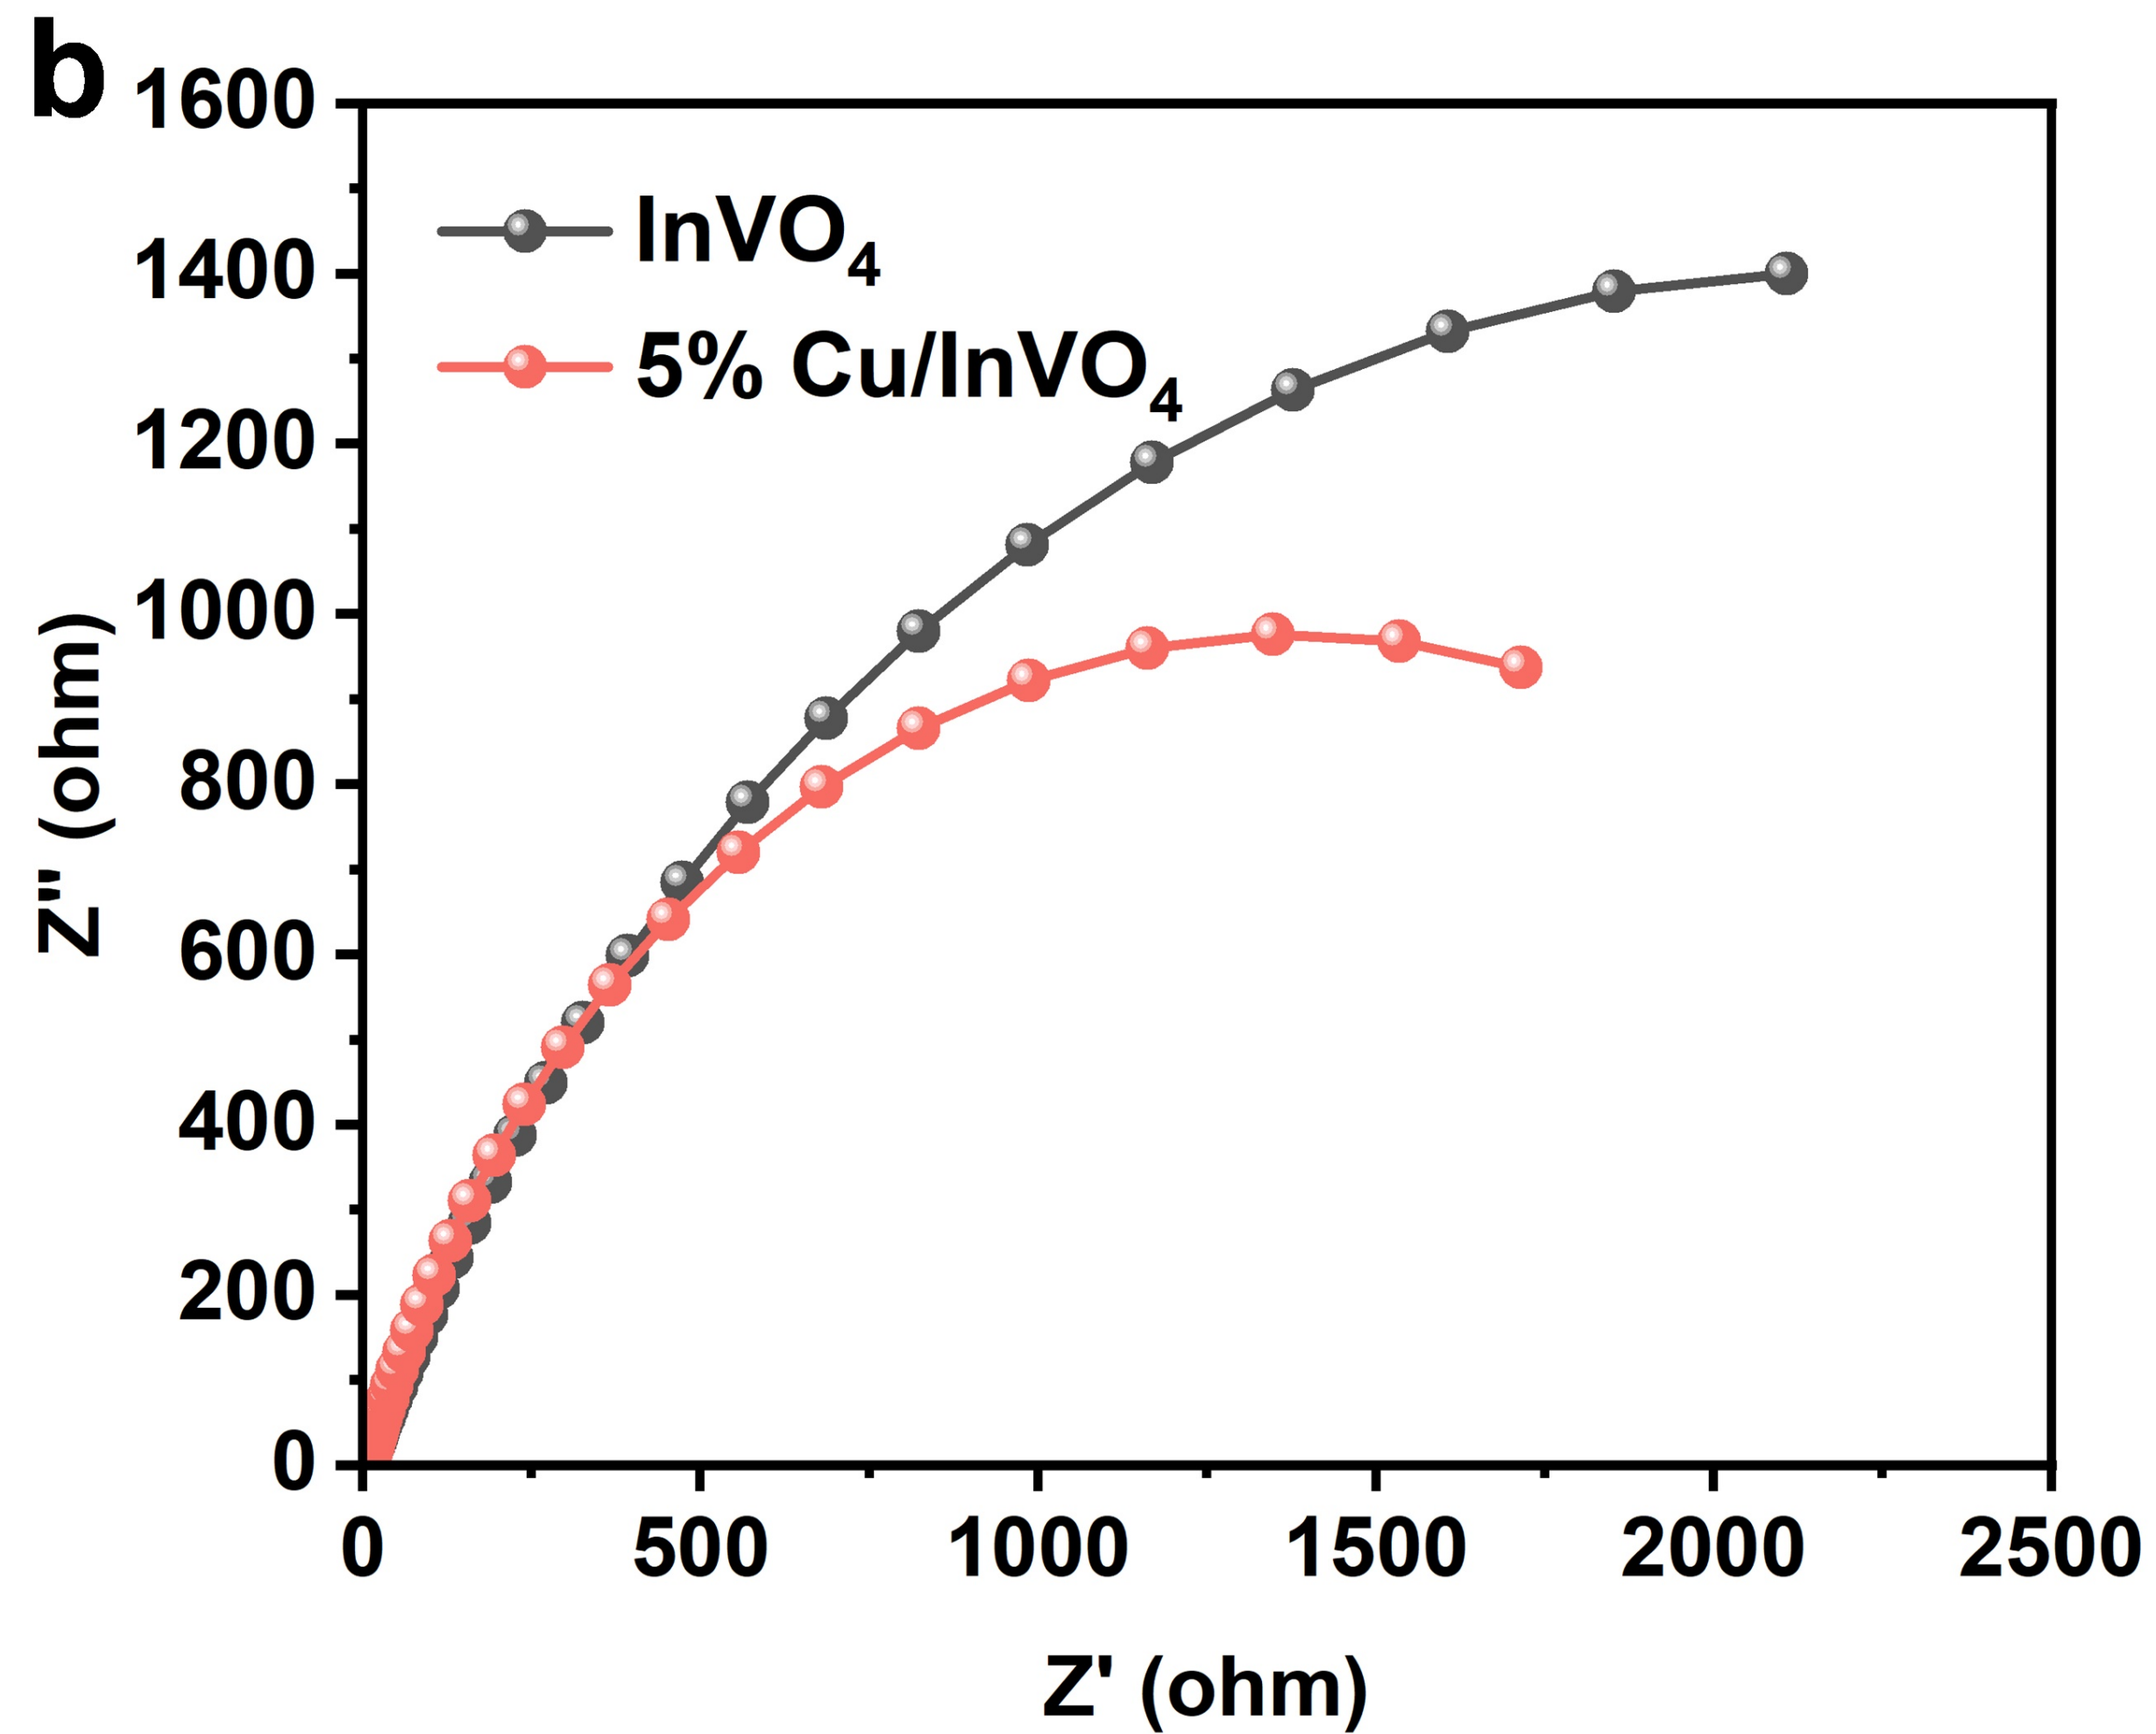

Supplement: d3cc04737g4.pdf [file d3cc04737g4.pdf]

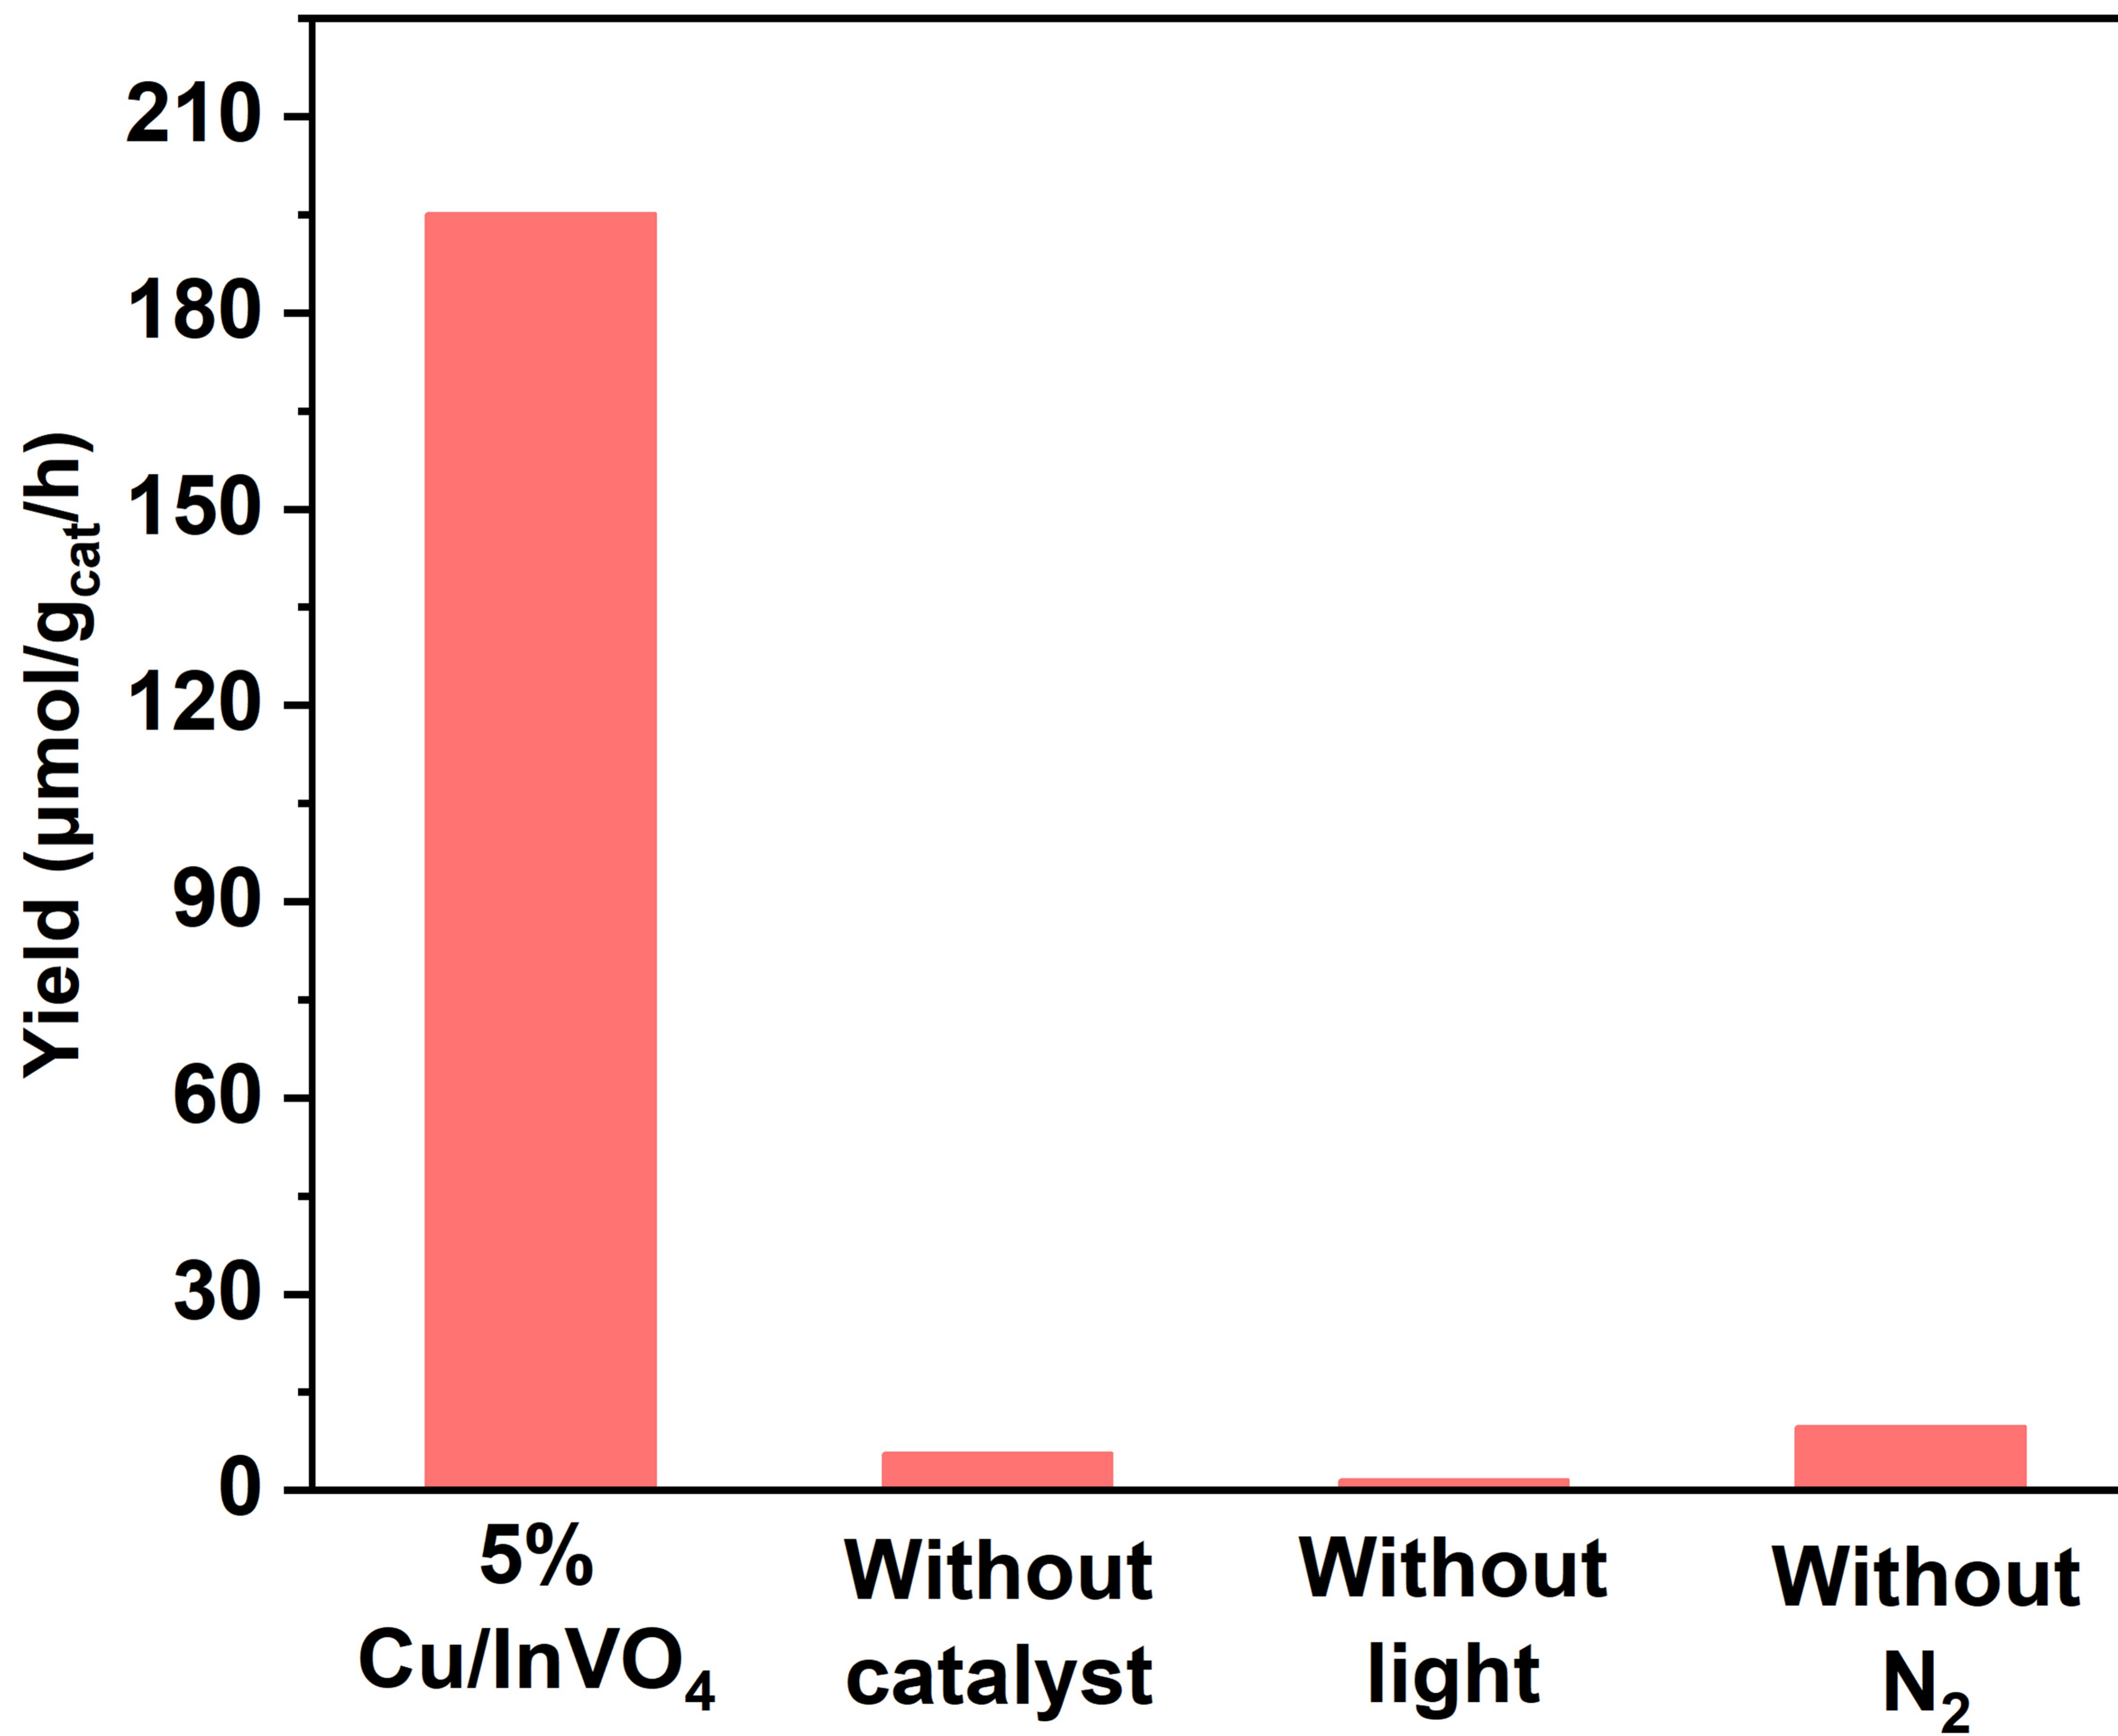

Supplement: d3cc04737g5.pdf [file d3cc04737g5.pdf]

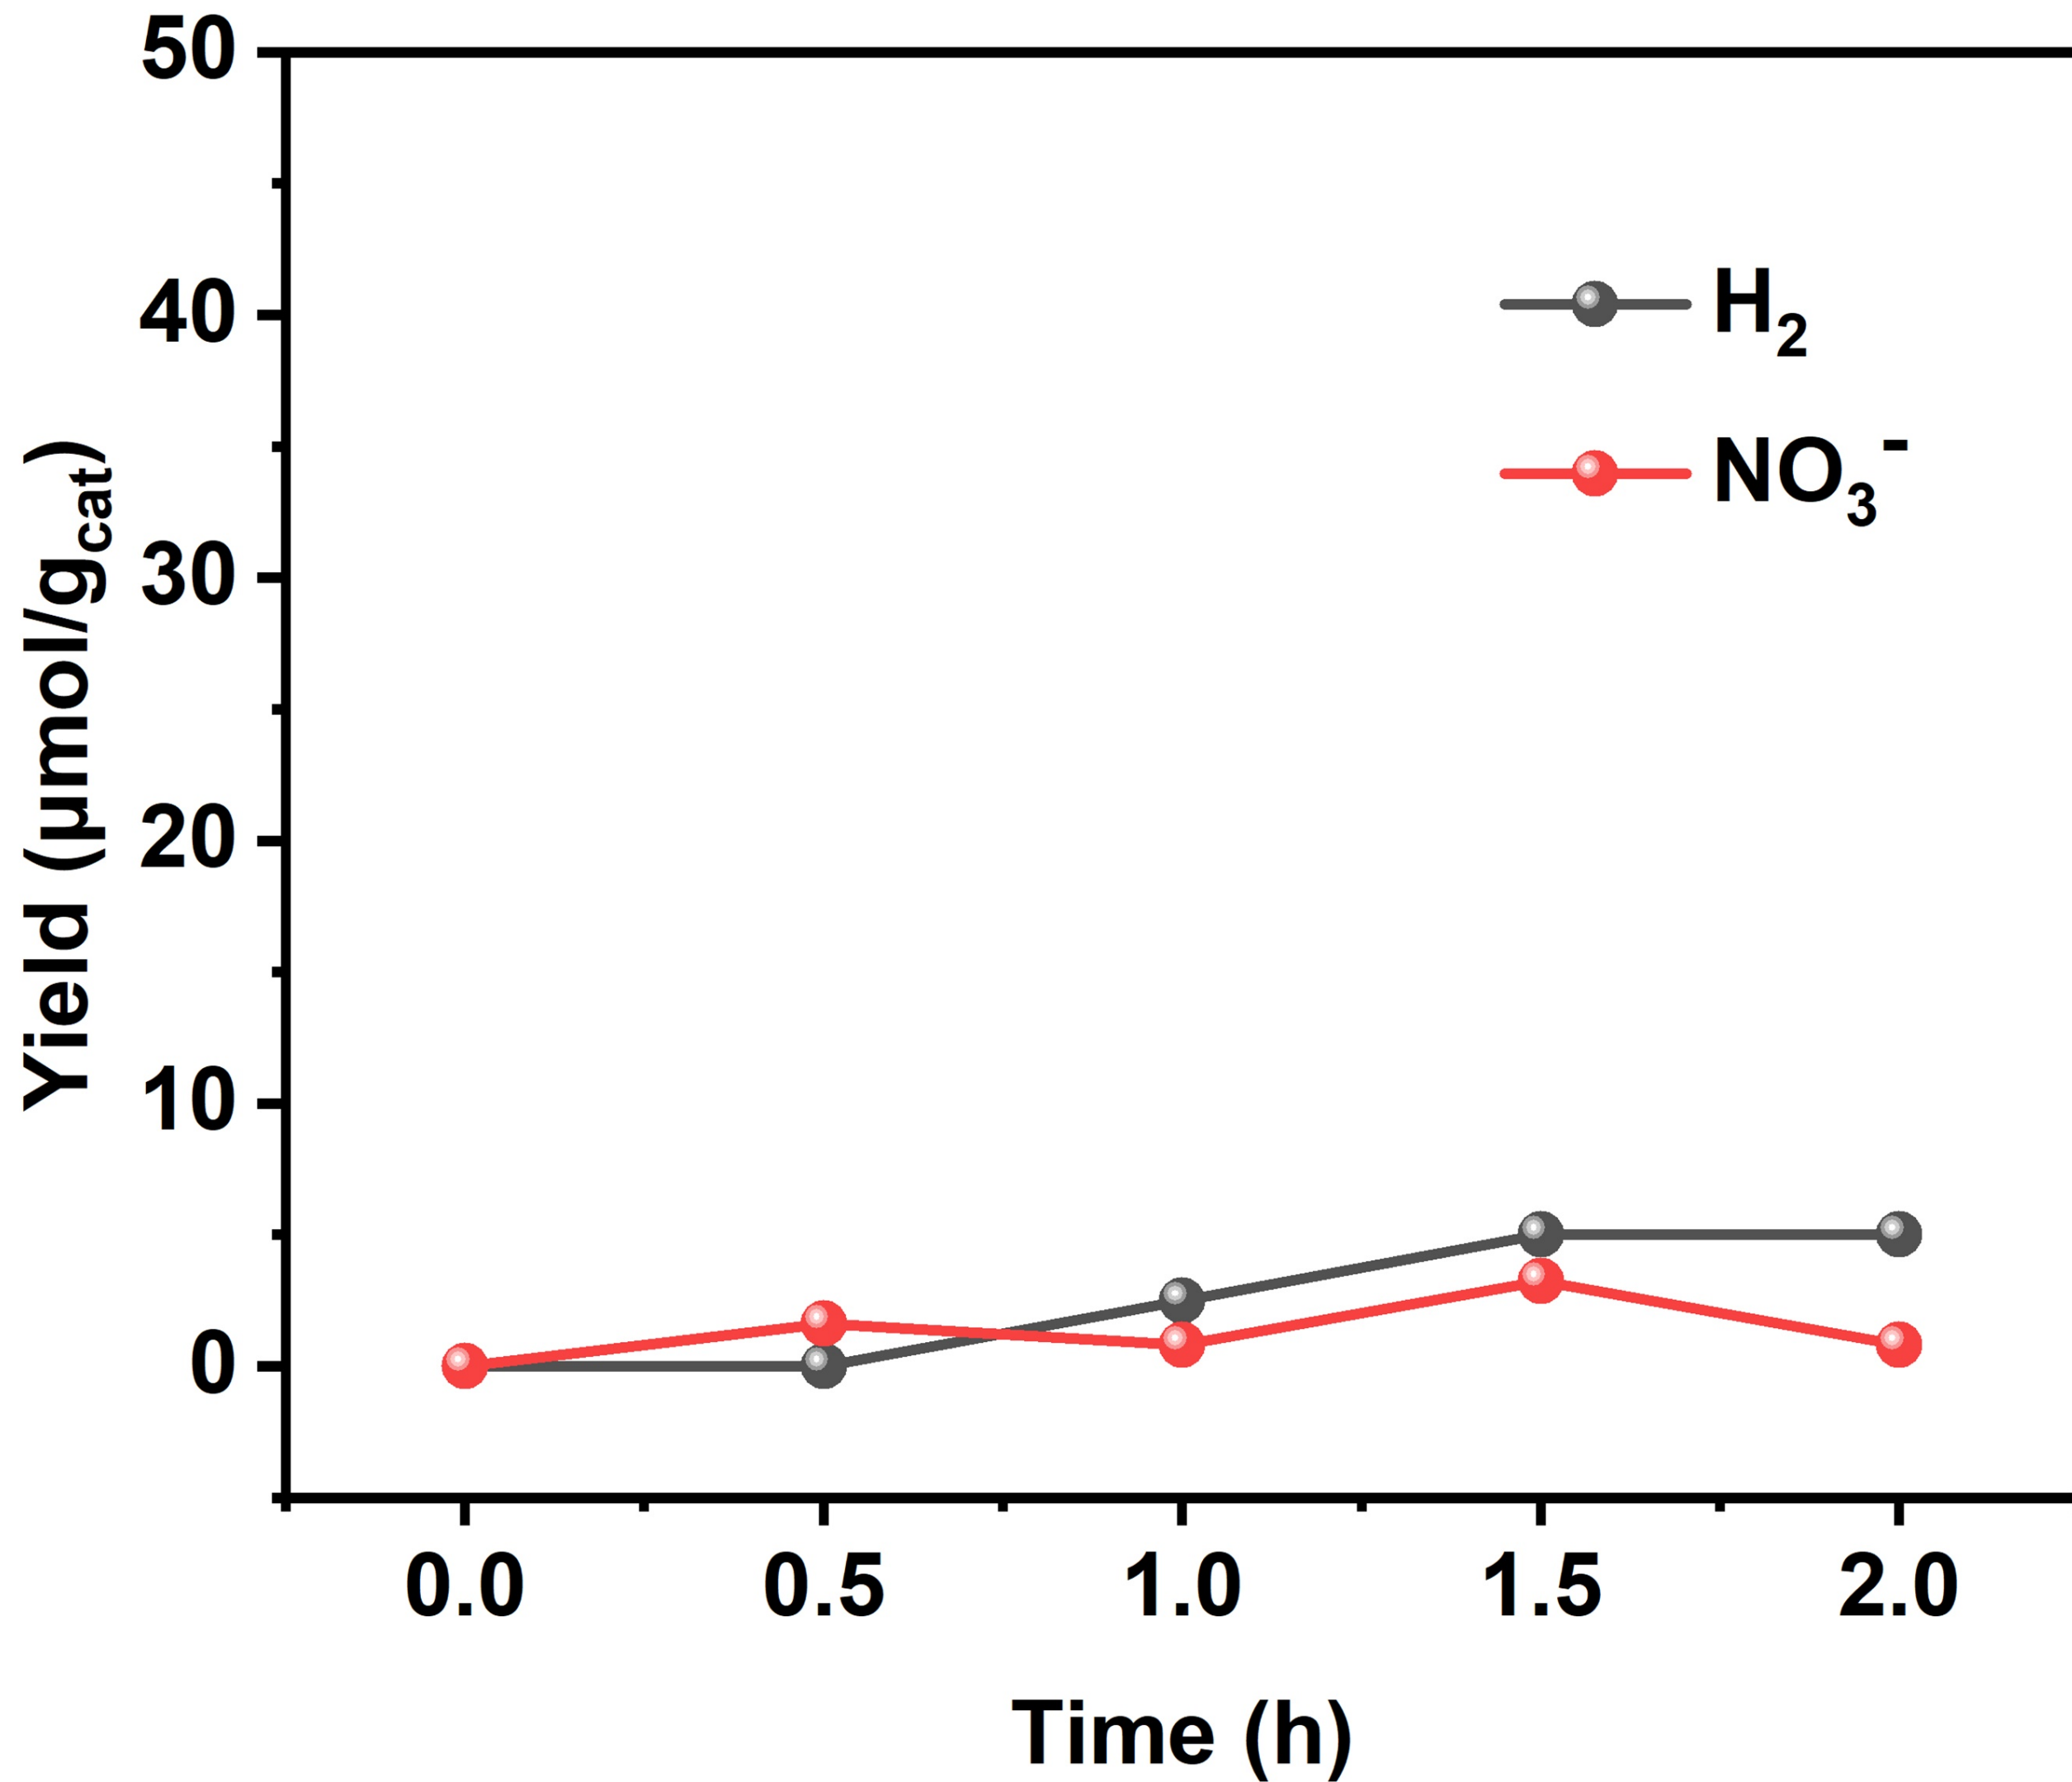

Supplement: d3cc04737g6.pdf [file d3cc04737g6.pdf]

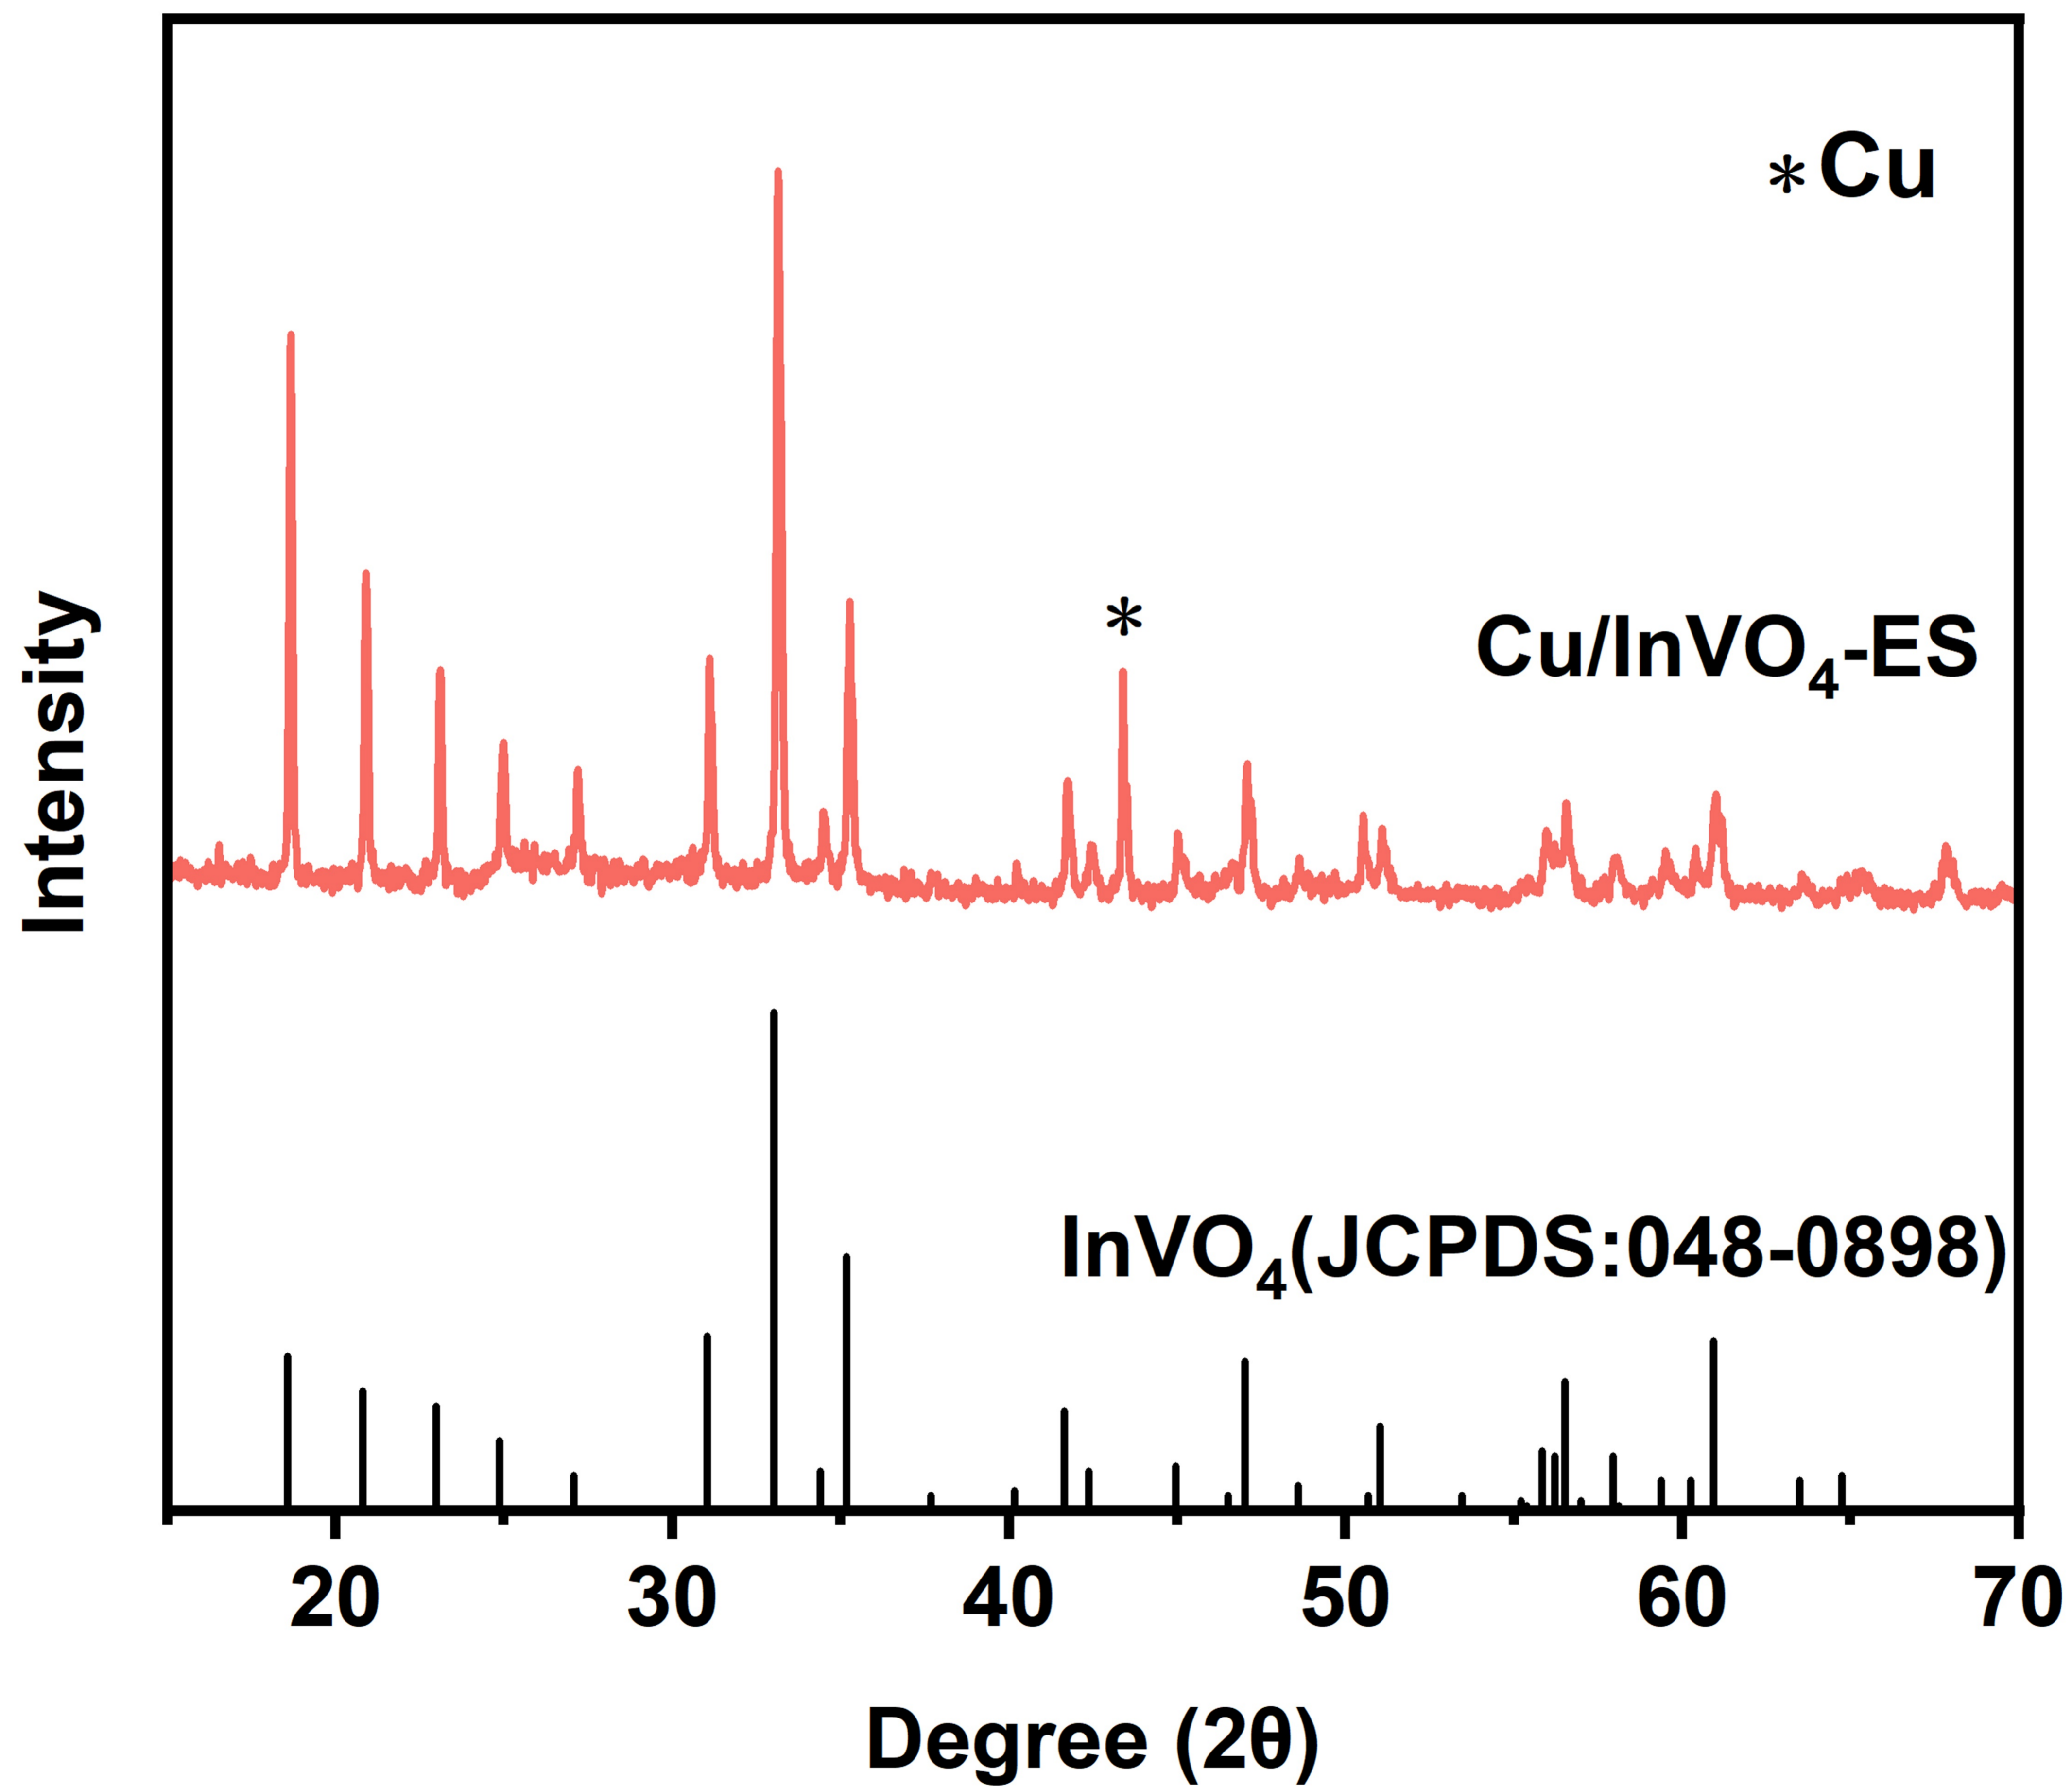

Supplement: d3cc04737g7.pdf [file d3cc04737g7.pdf]

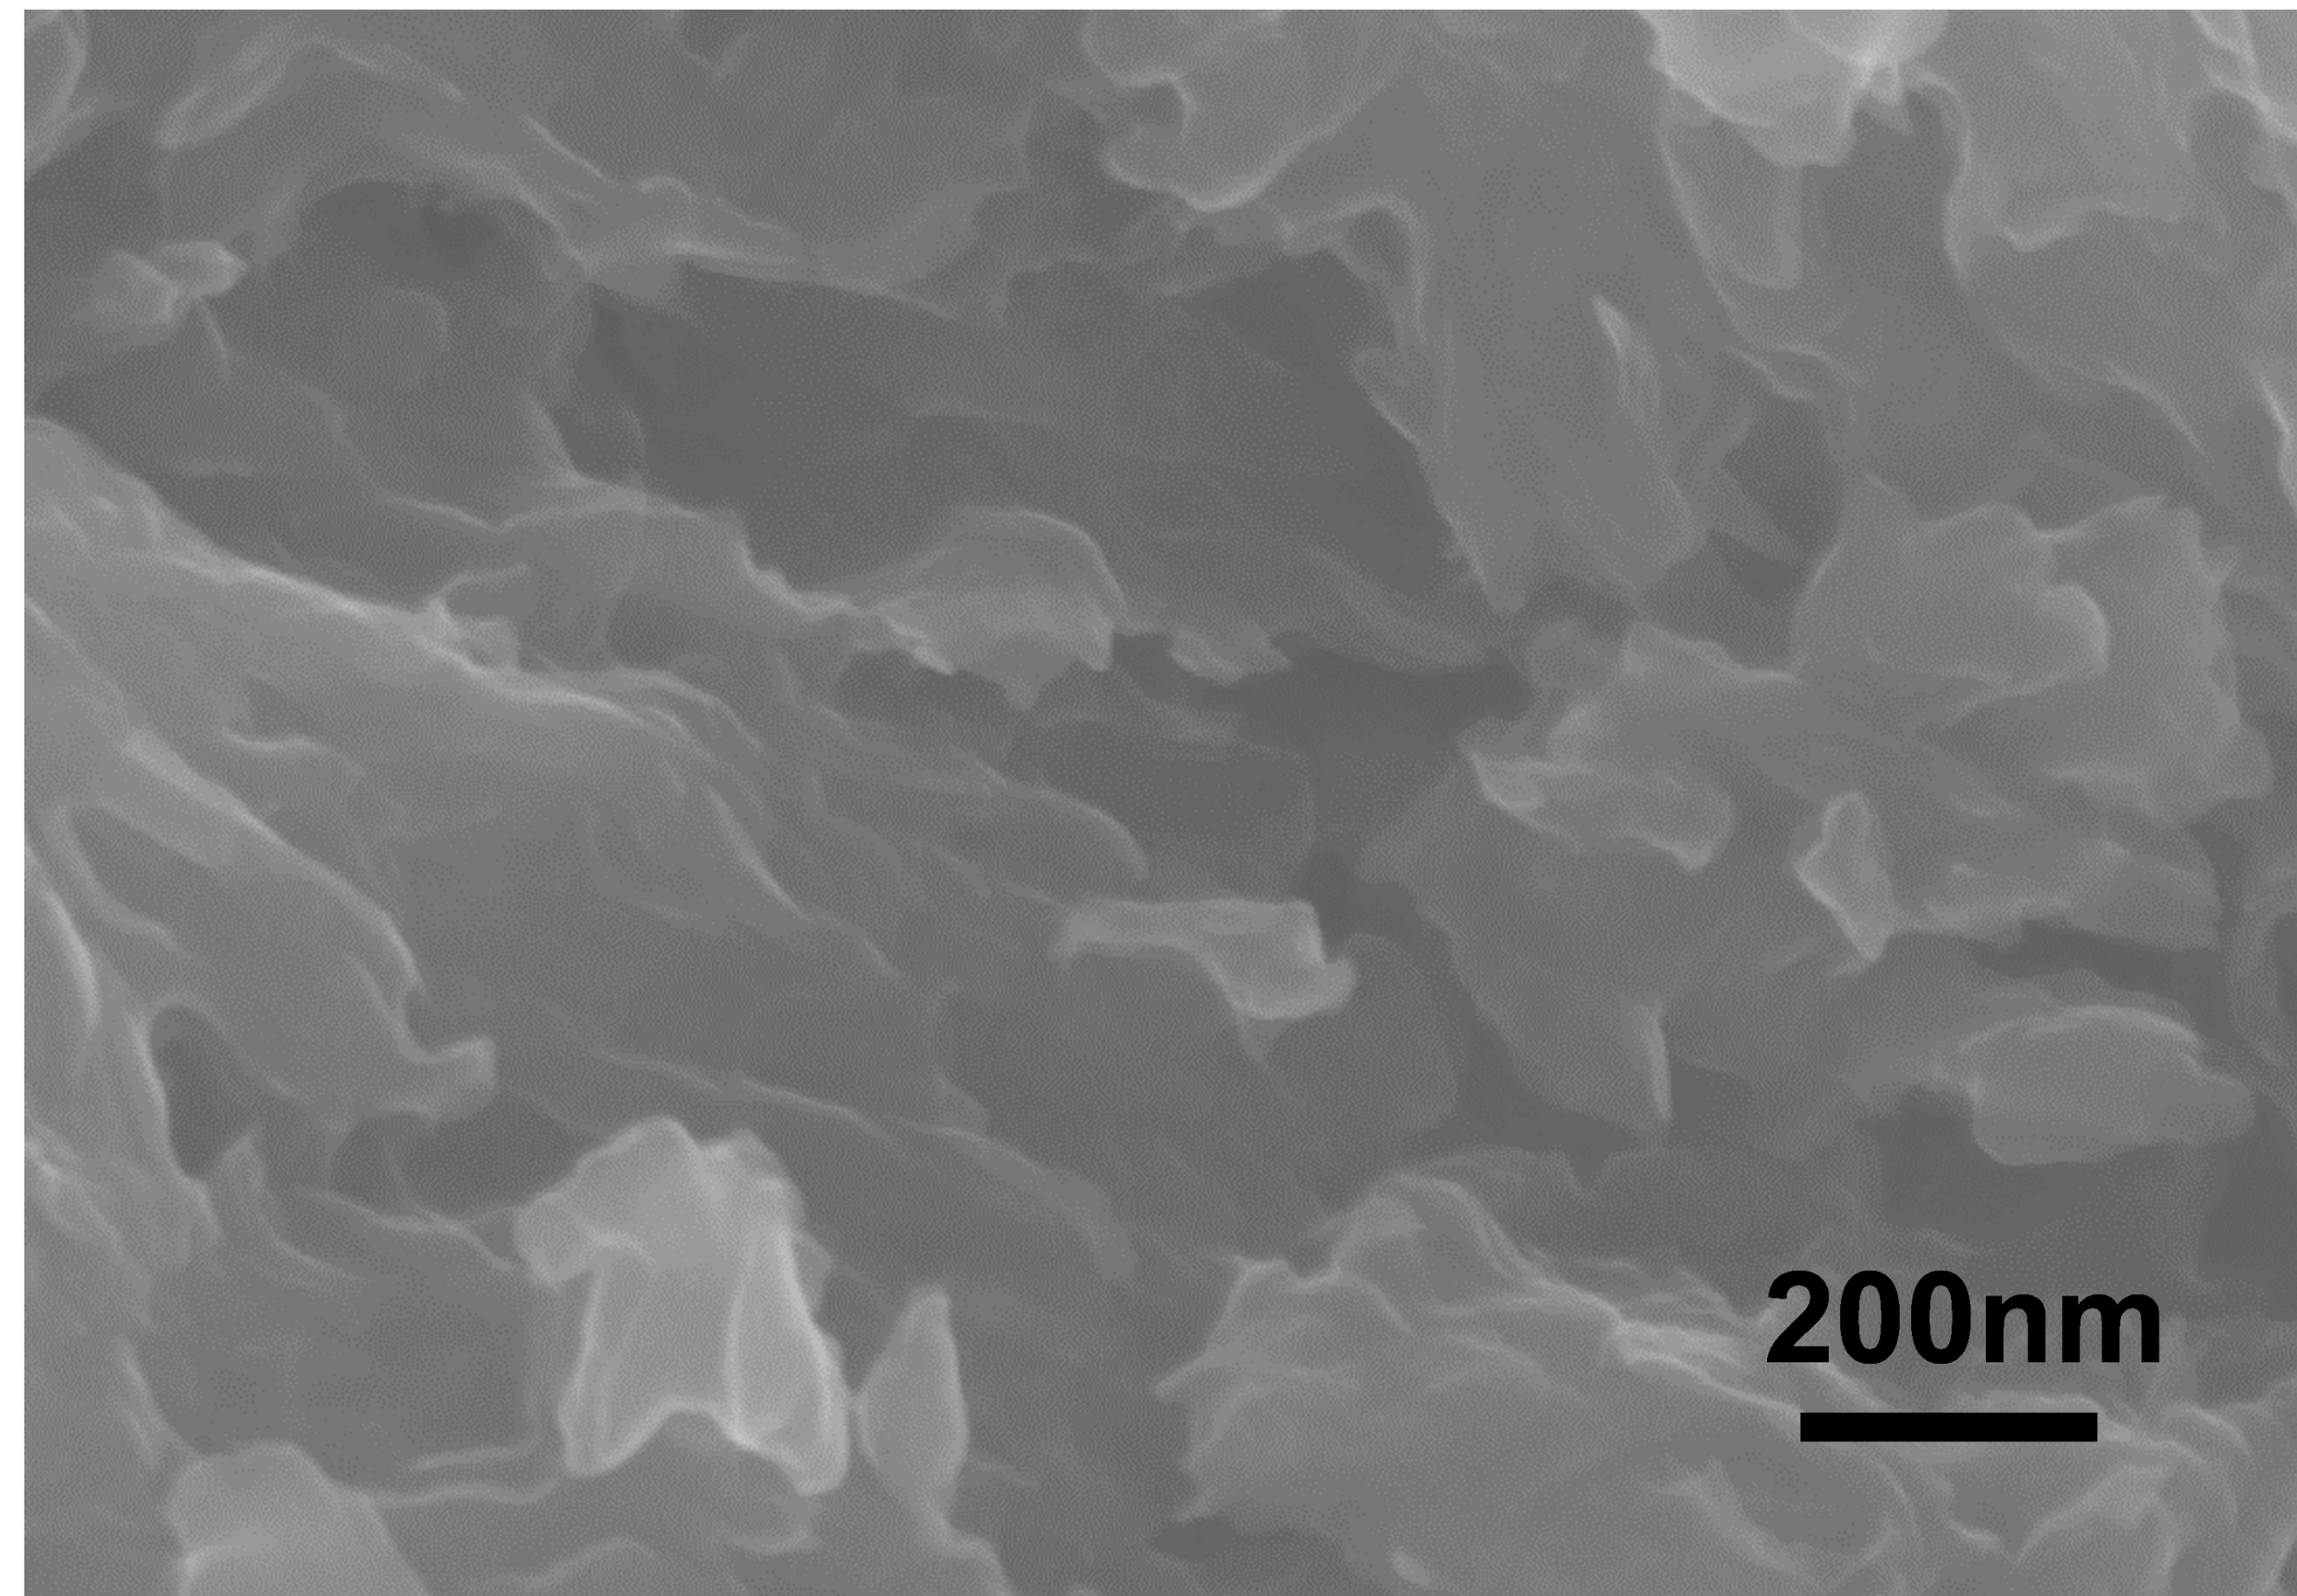

Supplement: d3cc04737g8.pdf [file d3cc04737g8.pdf]

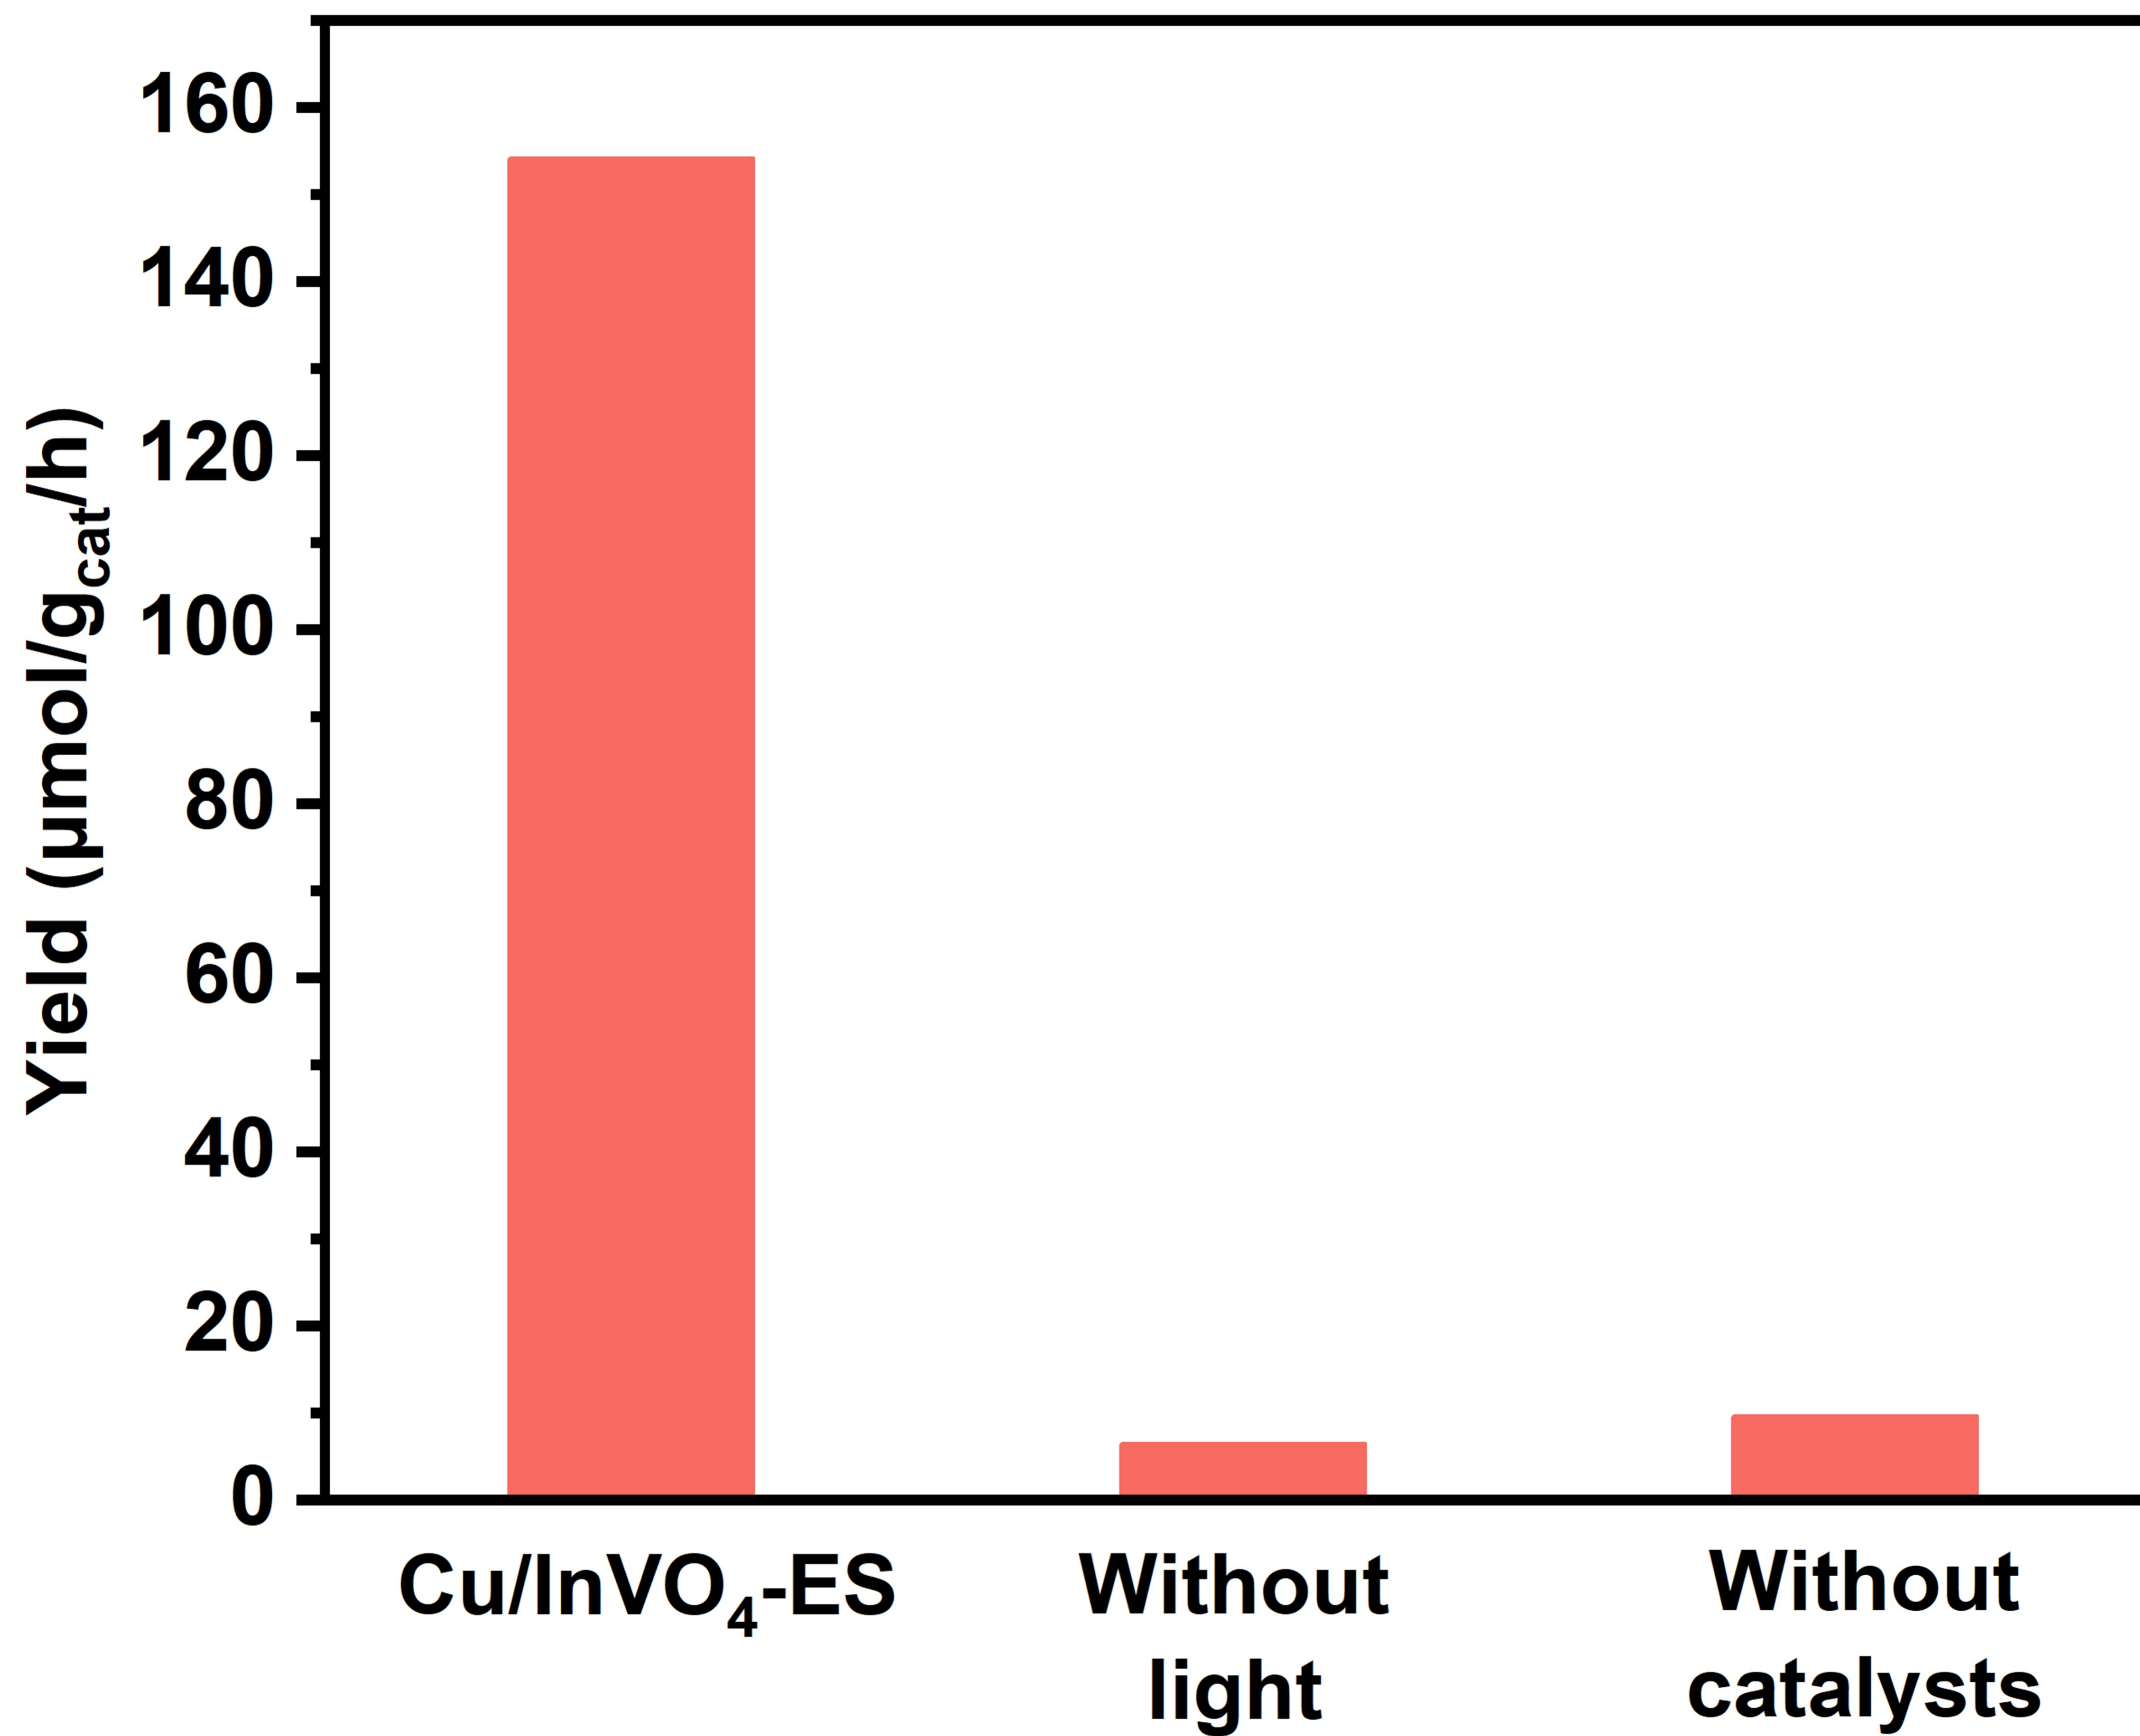

Supplement: d3cc04737g9.pdf [file d3cc04737g9.pdf]
